# Supplementary material for: Cytokine Levels in Saliva Are Associated with Salivary Gland Fibrosis and Hyposalivation in Mice after Fractionated Radiotherapy of the Head and Neck
Source: Preprints.org preprint supplement (doi:10.20944/preprints202309.0364.v1), 2023-09-06
Supplement: Supplementary file 2 [file supplementary]

Cytokine levels in saliva are associated with salivary gland fibrosis and hyposalivation in mice after fractionated radiotherapy of the head and neck

Supplementary figures

***
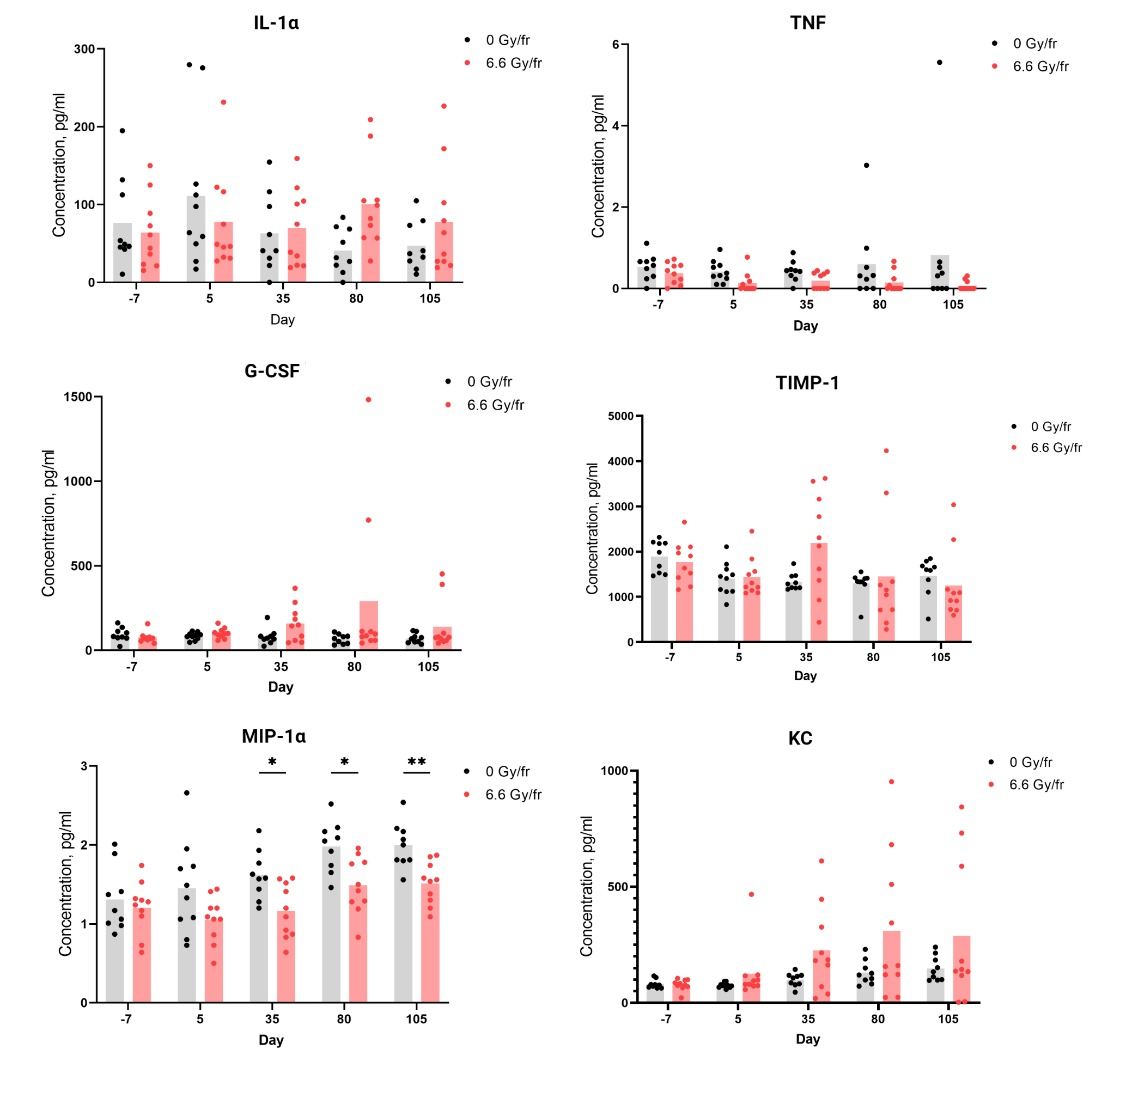
***

**Figure S1.** Levels of serum cytokines IL-1α, MIP-1α, KC, G-CSF, TIMP-1 and TNF before and after fractionated irradiation at day -7, 5, 35, 80 and 105 (n = 9 in the control group, n = 10 in the irradiated group). Data are presented as mean pg/ml cytokine (*p<0.05, **p<0.01).


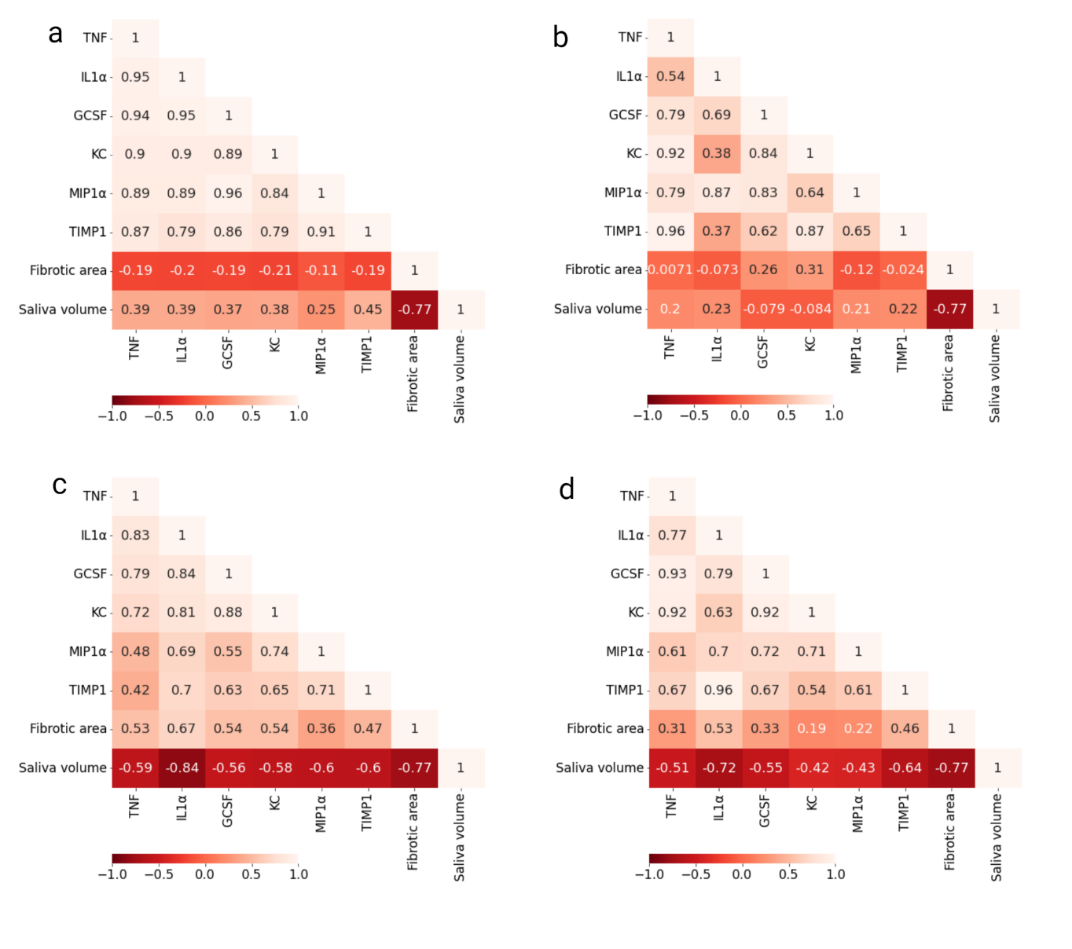


**Figure S2.** Pearson’s correlation matrix for combined (controls and irradiated) salivary cytokine expression on: (**a**) baseline, (**b**) day 5, (**c**) day 80, (**d**) day 105.


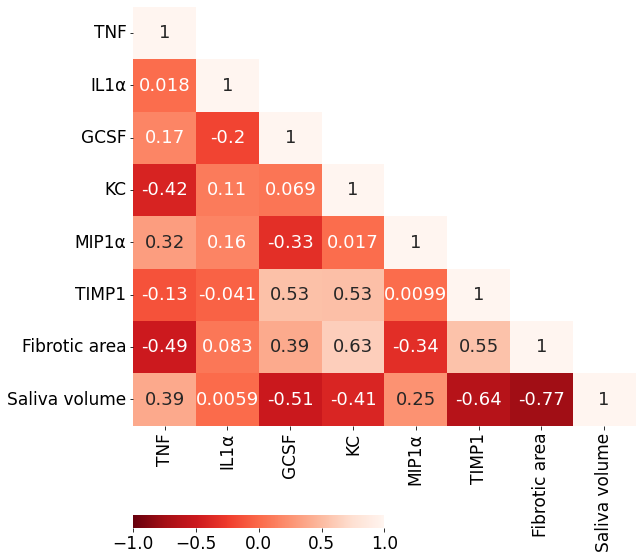


**Figure S3.** Pearson’s correlation matrix for combined cytokine levels in serum on day 35.
